# Supplementary material
Source: MDPI journal article supplement (https://www.mdpi.com/2225-1154/5/2/38)
Supplement: s1 [file s1]

## Supplementary materials

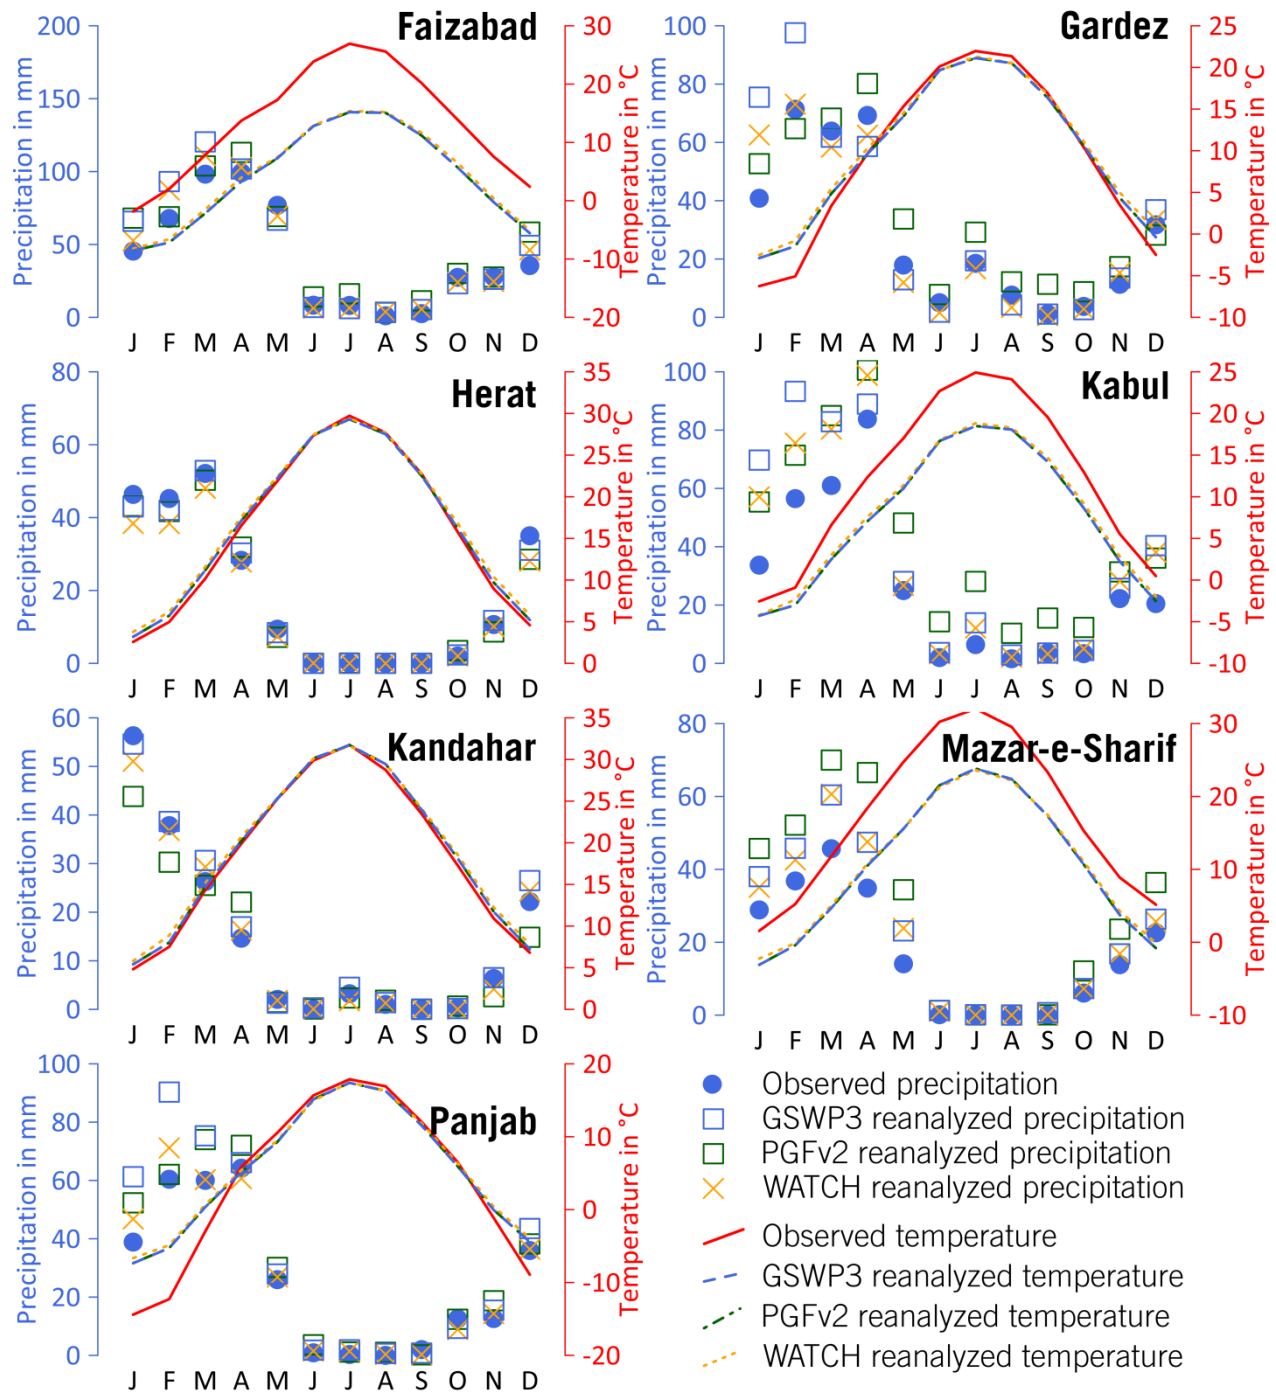

Figure S1: Validation of long-term monthly mean temperature and monthly mean precipitation of three reanalysis products (Global Soil Wetness Project Phase 3 (GSWP3), WATCH Forcing Data 20th Century (WATCH), second version of the Global Meteorological Forcing Dataset for land surface modeling of Princeton University (PGFv2)) against observation data for one weather station in each of the six climate regions of Afghanistan and Kabul (Figure 1b) (see section 2.2.2 for periods).

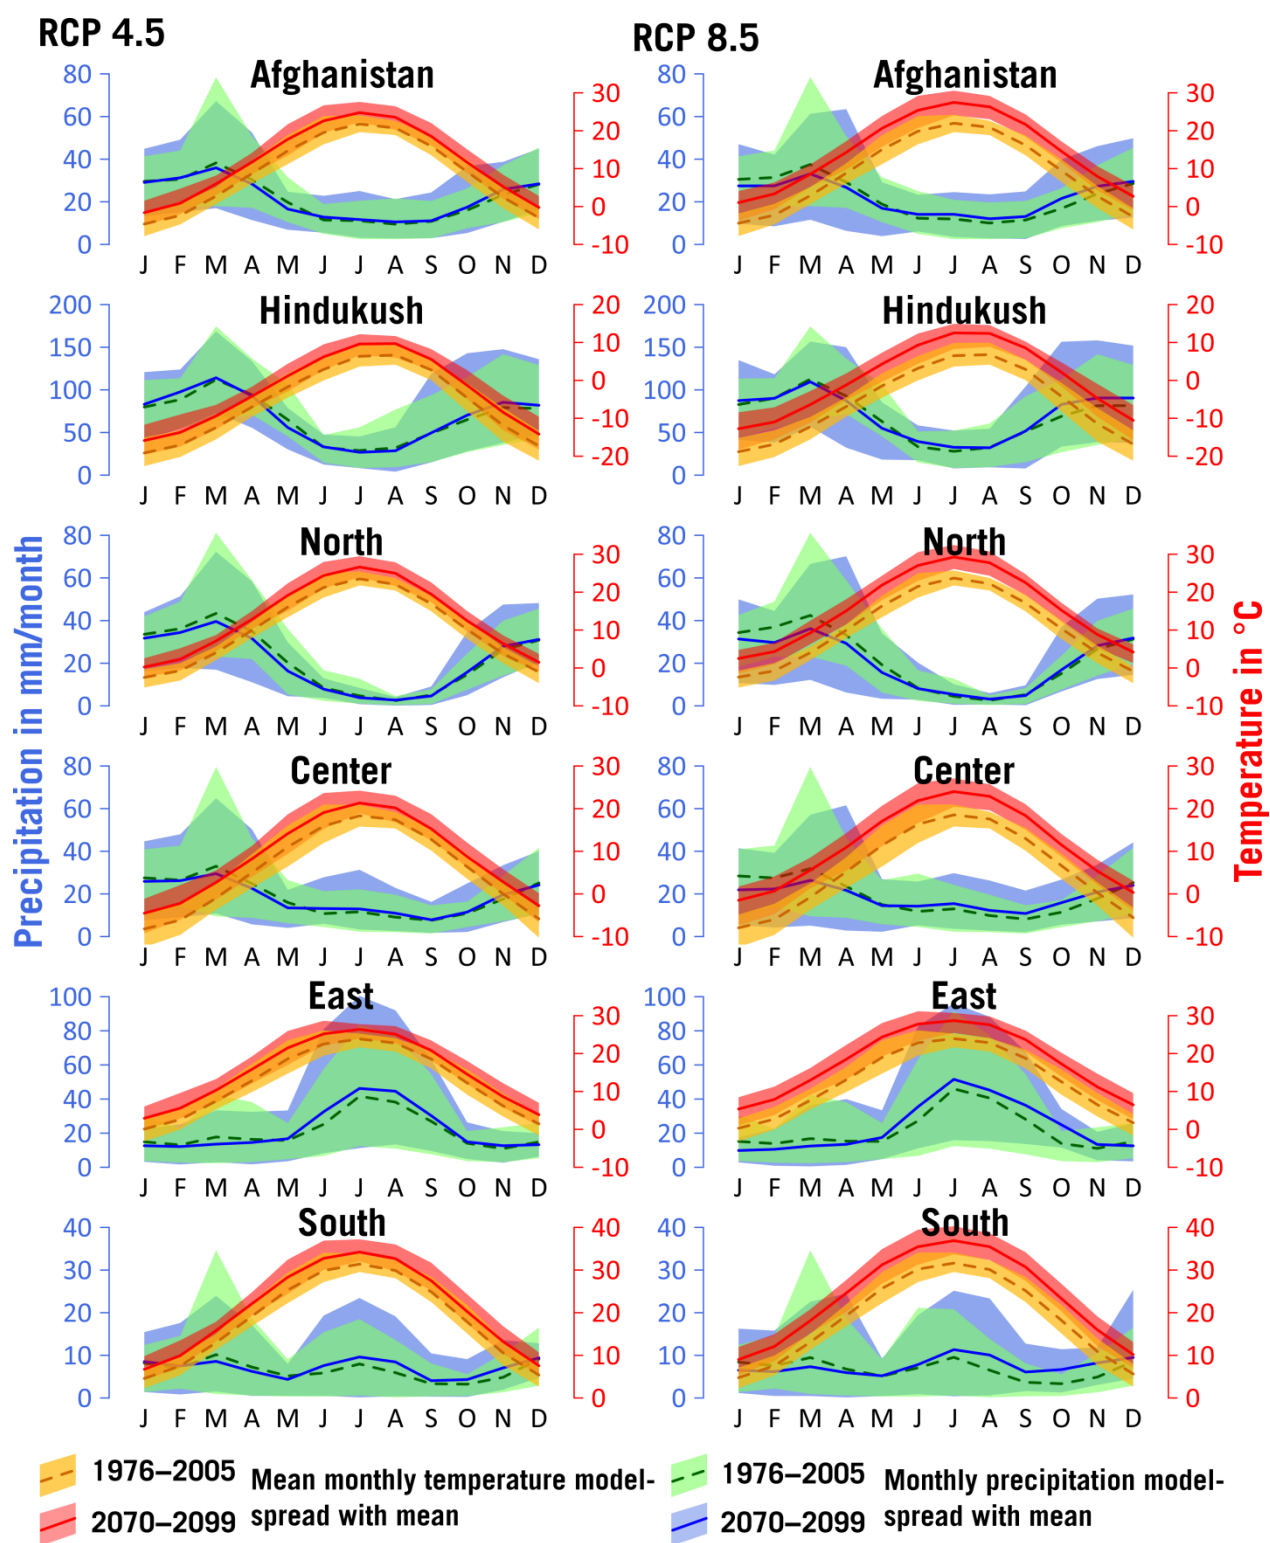

Figure S2: Projected changes of seasonality for temperature and precipitation as monthly values for the periods 1976–2005 and 2070–2099 for all Afghanistan and five climate regions for Representative Concentration Pathways 4.5 and 8.5.
